# Supplementary material
Source: Springer Nature journal article supplement (https://www.springermedizin.de/resource/supplementary/12936_2009_996_MOESM1_ESM.pdf/9548740)

# FRONT

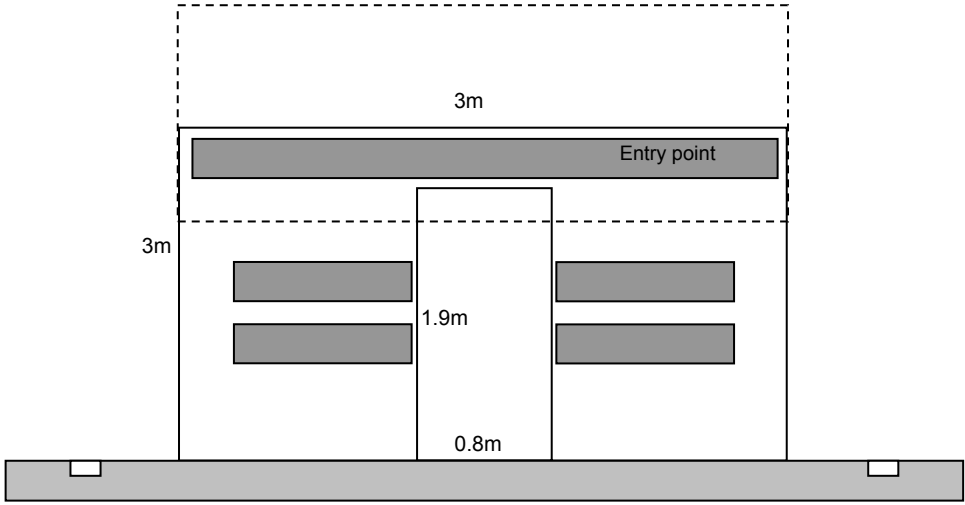

# SIDE

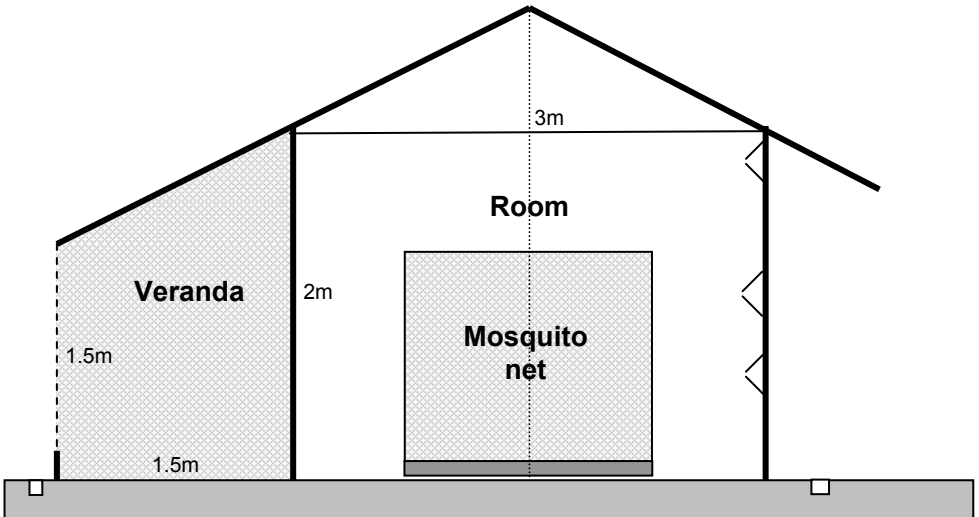

Supplement: MOESM1 [file 9548740]
